# Supplementary material
Source: Springer Nature journal article supplement (https://www.springermedizin.de/resource/supplementary/12978_2013_240_MOESM2_ESM.pdf/9602306)
Supplement: MOESM2 [file 9602306]

## a. Bladder filling pain

- Do you suffer from pain when your bladder is filling? Yes/No

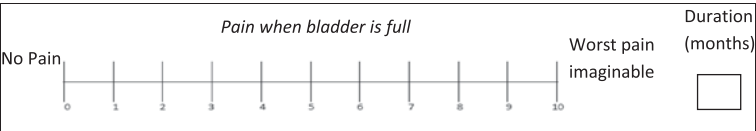

## b. Bladder wall tenderness

- Was there bladder wall tenderness on vaginal examination? Yes/No
